# Supplementary material for: Cognitive Impairment At 3, 6 and 12 Month After the First-Ever Stroke Among Lebanese Survivors: Incidence and Risk Factors
Source: Research Square preprint supplement (doi:10.21203/rs.3.rs-147073/v1), 2021-01-19
Supplement: Supplementary file 1 [file 096377ef9eb8e3534858739b.pdf]

Table 2 : The quality of life measured by the SF-12 (Short Form Health Survey) in Lebanese survivors aged  $\geq 18$  years old admitted to hospitals in Mount Lebanon and Beirut between February and May 2018.  
PCS: Physical Component Summary; MCS: Mental Component Summary.

| Short Form Health Survey (SF-12)           | 3 months<br>Mean ( $\pm$ SD) | 6 months<br>Mean ( $\pm$ SD) | 12 months<br>Mean ( $\pm$ SD) |
|--------------------------------------------|------------------------------|------------------------------|-------------------------------|
| <b>Physical component summary (PCS)</b>    |                              |                              |                               |
| <i>General Health</i>                      | 4.35 ( $\pm$ 0.80)           | 3.78 ( $\pm$ 0.97)           | 3.42 ( $\pm$ 1.17)            |
| <i>Physical activity</i>                   | 2.64 ( $\pm$ 0.99)           | 3.22 ( $\pm$ 1.29)           | 3.72 ( $\pm$ 1.65)            |
| <i>Limitations due to physical health</i>  | 2.27 ( $\pm$ 0.61)           | 2.50 ( $\pm$ 0.81)           | 2.82 ( $\pm$ 0.96)            |
| <i>Pain</i>                                | 3.66 ( $\pm$ 1.26)           | 2.94 ( $\pm$ 1.24)           | 2.37 ( $\pm$ 1.34)            |
| <b>Total</b>                               | 12.94 ( $\pm$ 1.41)          | 12.44 ( $\pm$ 1.52)          | 12.33 ( $\pm$ 1.61)           |
| <b>Mental component summary (MCS)</b>      |                              |                              |                               |
| <i>Vitality</i>                            | 4.58 ( $\pm$ 1.29)           | 4.15 ( $\pm$ 1.37)           | 3.70 ( $\pm$ 1.55)            |
| <i>Life and relations with others</i>      | 2.22 ( $\pm$ 0.89)           | 2.49 ( $\pm$ 1.10)           | 3.01 ( $\pm$ 1.43)            |
| <i>Limitations due to emotional health</i> | 2.32 ( $\pm$ 0.66)           | 2.50 ( $\pm$ 0.81)           | 2.83 ( $\pm$ 0.96)            |
| <i>Emotional health</i>                    | 7.25 ( $\pm$ 1.11)           | 7.10 ( $\pm$ 1.23)           | 7.02 ( $\pm$ 1.50)            |
| <b>Total</b>                               | 16.39 ( $\pm$ 1.78)          | 16.25( $\pm$ 1.66)           | 16.66 ( $\pm$ 2.41)           |
