# Supplementary material for: Cognitive Impairment At 3, 6 and 12 Month After the First-Ever Stroke Among Lebanese Survivors: Incidence and Risk Factors
Source: Research Square preprint supplement (doi:10.21203/rs.3.rs-147073/v1), 2021-01-19
Supplement: Supplementary file 2 [file 453a79f6236978e4c9a410b8.pdf]

**Table 8. Multivariable Analysis.**

|                                                                       | <b>AOR [95% CI]</b>    | <b>p-value</b> |
|-----------------------------------------------------------------------|------------------------|----------------|
| <b>Factors associated to PSCI at 3 month<sup>a</sup></b>              |                        |                |
| Employment status post stroke                                         | 0.295 [0.144 - 0.604]  | 0.001          |
| Sedentary behavior                                                    | 2.797 [1.215 - 6.411]  | 0.016          |
| Duration between the stroke symptoms onset and the hospital admission | 0.442 [0.209 - 0.935]  | 0.033          |
| <b>Factors associated to PSCI at 6 month<sup>b</sup></b>              |                        |                |
| Age                                                                   | 1.660 [1.063 - 2.594]  | 0.026          |
| Education level                                                       | 0.287 [0.102 - 0.809]  | 0.018          |
| Past-smoker                                                           | 3.949 [1.216 - 12.830] | 0.022          |
| Depression at 3 month post stroke                                     | 4.340 [2.070 - 9.099]  | <0.001         |
| Pressure ulcers at 3 month post stroke                                | 3.130 [1.057 - 9.270]  | 0.039          |
| <b>Factors associated to PSCI at 12 month<sup>c</sup></b>             |                        |                |
| Age                                                                   | 1.991 [1.191 - 3.330]  | 0.009          |
| History of diabetes mellitus                                          | 0.304 [0.099 - 0.940]  | 0.039          |
| Sedentary behavior                                                    | 3.130 [1.434 - 6.835]  | 0.004          |
| Depression at 12 month post stroke                                    | 2.965 [1.574 - 5.585]  | 0.001          |
